# Supplementary material for: Molecularly imprinted polymer-coated hybrid optical waveguides for sub-aM fluorescence sensing
Source: Royal Society of Chemistry journal article supplement (doi:10.1039/d3an01008b), 2023-12-18
Supplement: d3an01008b1.pdf [file d3an01008b1.pdf]

## Supporting Information

### **Molecularly Imprinted Polymer-Coated Hybrid Optical Waveguide for Sub- aM Fluorescent Sensing**

*Yingying Xu,<sup>a</sup> Yingtao Zhou,<sup>a</sup> Hong Luo,<sup>a</sup> Hao Li,<sup>a</sup> Tiancheng Ni,<sup>a</sup> Gongjie Xu,<sup>a</sup> Okihito*

*Sugihara,<sup>b</sup> Jingya Xie<sup>a</sup> and Bin Cai\*<sup>a</sup>*

<sup>1</sup> School of Optical Electrical and Computer Engineering, University of Shanghai for Science  
and Technology, No. 516 Jungong Rd, Shanghai, 200093, China

<sup>2</sup> Graduate School of Engineering, Utsunomiya University, Utsunomiya 321-8585, Japan

Corresponding author: Bin Cai, Email: [bullcai@usst.edu.com](mailto:bullcai@usst.edu.com)

# Contents

1. **Figure S1.** 3D simulation model for the MIP coated optical fibre-waveguide sensing probe.
2. **Table S1.** parameters used in the 3D simulation
3. **Figure S2.** Simulation result of the fibre-waveguide sensing probe without MIP coating on the waveguide.
4. **Figure S3.** Optical losses of the HQNPs hybrid waveguide.
5. **Figure S4.** The absorption spectra of the Rh 6G and Rh B mixture measured by Shimadzu UV-vis 2600 spectrometer and MIP-OFHWF.
6. **Figure S5.** Correlation between normalized fluorescent intensity  $S$  and the Rh B concentration measured by NIP-OFHWF.
7. **MIP layer coating process.**
8. **Figure S6.** Process of MIP-coated waveguide fabrication.

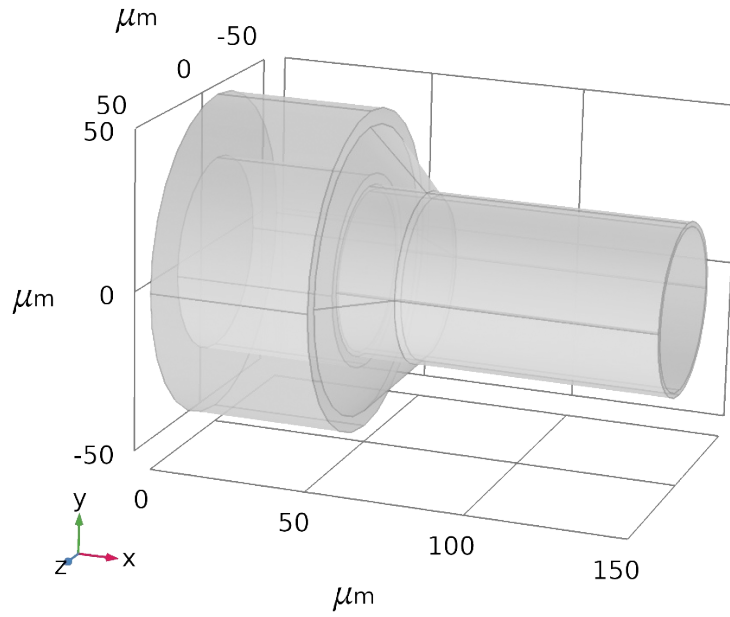

**Figure S1.** 3-D simulation model of MIP coated optical fibre waveguide structure.

**Table S1.** Simulation parameters used for the optical fibre-waveguide structure simulation

|                             |       |                             |                  |                        |                   |                  |                   |
|-----------------------------|-------|-----------------------------|------------------|------------------------|-------------------|------------------|-------------------|
| $n_{\text{waveguide}}$      | 1.44  | $r_{\text{waveguide}}$      | 25 $\mu\text{m}$ | $r_{\text{tapertop}}$  | 25 $\mu\text{m}$  | $t_{\text{MIP}}$ | 1.5 $\mu\text{m}$ |
| $n_{\text{fibreccladding}}$ | 1.45  | $r_{\text{fibrecore}}$      | 30 $\mu\text{m}$ | $l_{\text{waveguide}}$ | 100 $\mu\text{m}$ | Wavelength       | 550 nm            |
| $n_{\text{fibrecore}}$      | 1.455 | $r_{\text{fibreccladding}}$ | 50 $\mu\text{m}$ | $l_{\text{taper}}$     | 20 $\mu\text{m}$  | Method           | Beam envelopes    |
| $n_{\text{MIP}}$            | 1.57  | $r_{\text{taper bottom}}$   | 45 $\mu\text{m}$ | $l_{\text{fibre}}$     | 50 $\mu\text{m}$  |                  |                   |

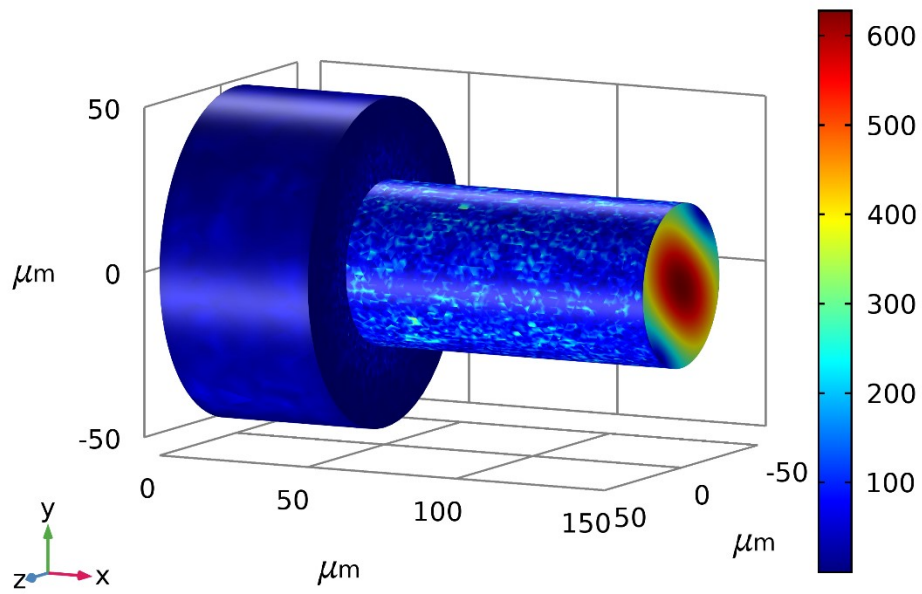

**Figure S2.** A typical simulation result of optical fibre-waveguide structure without high-n MIP coating layer. The propagation light is confined in the waveguide core, which is distinguished with that of MIP coated model.

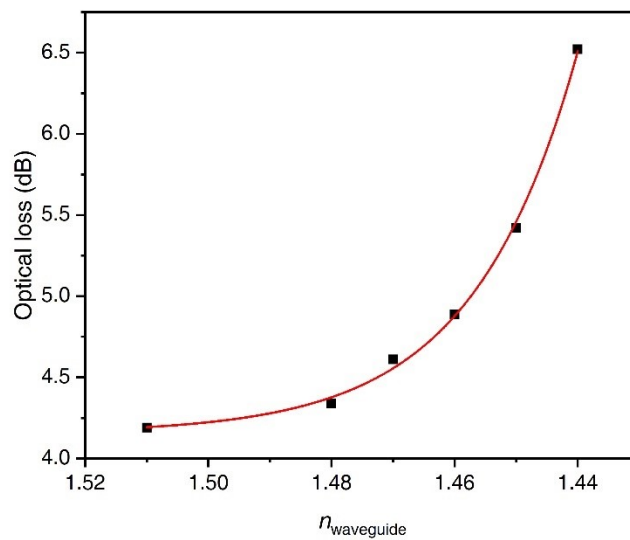

**Figure S3.** Optical losses of HQNPs hybrid waveguide as a function of waveguide refractive index. The hybrid waveguide lengths were fixed at 6 mm.

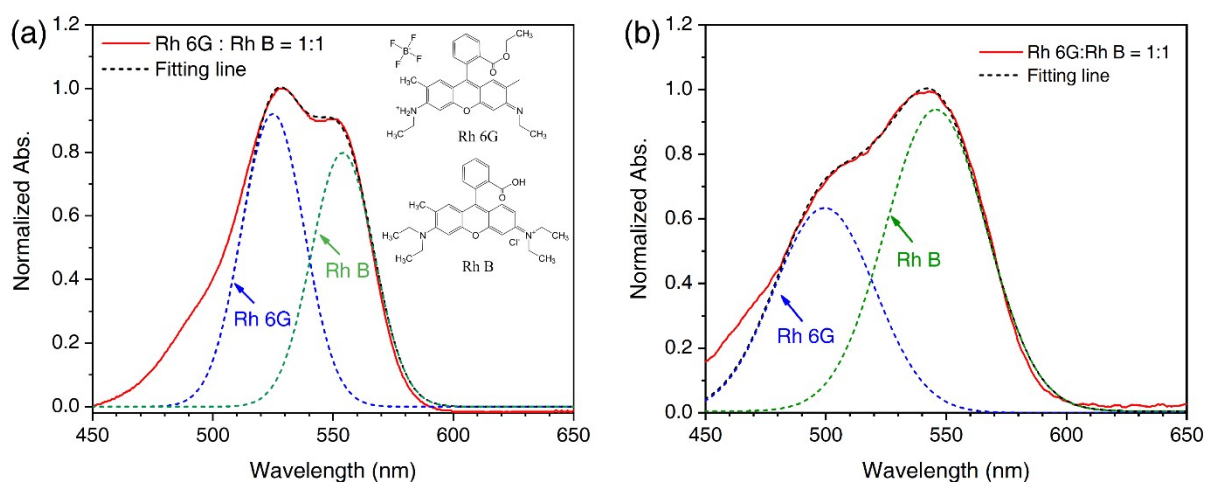

**Figure S4.** (a) The absorption spectrum of the Rh 6G and Rh B mixture measured by non-selective Shimadzu UV-vis 2600 spectrometer. The insets show the molecular structures of Rh 6G and Rh B, respectively. (b) The spectrum measured by MIP-OFHWF sensing system. The concentration of both Rh 6G and Rh B was  $1.0 \times 10^{-6}$  g/ml. The red solid line represents the experimental data, while the dashed lines represent the fitting lines. The black dashed line represents the sum of the blue and green dashed lines.

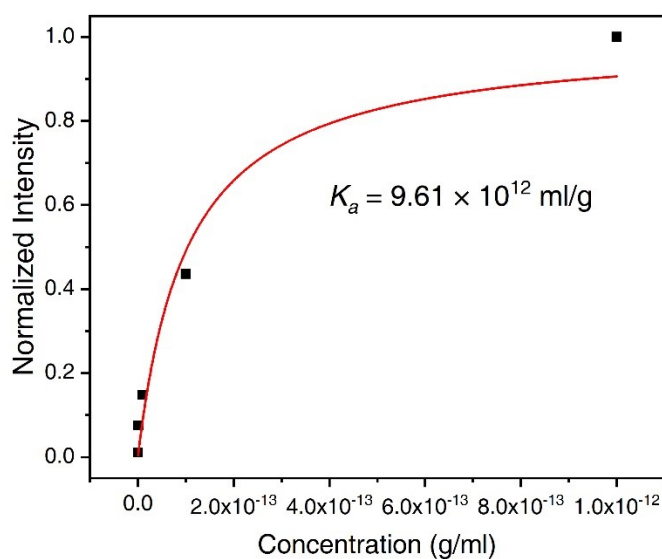

**Figure S5.** Correlation between normalized fluorescent intensity  $S$  and the Rh B concentration measured by NIP-OFHWF.

## MIP layer coating process:

### 1. MIP precursor preparation

Polyethylene glycol 600 diacrylate (PEGDA, 5 g), 2-phenylphenoxyethyl acrylate (OPPEA, 10 g), ethanol (1.5 ml), and Rh B (0.005 g) were weighed into a 20 ml vial and stirred for 2 h at room temperature. Thereafter, 0.06 g of methylacrylic acid (MAA) and 0.05 g of Diphenyl(2,4,6-trimethylbenzoyl)phosphine oxide (TPO) were added to the mixture and stirred for 1 h to achieve homogeneity. The mixture was filtered through a 0.25  $\mu\text{m}$  filter to decrease the non-solvated residues.

### 2. MIP coating procedure

The MIP precursor was dropped on the HQNPs hybrid waveguide section of the OFWF, after which 405 nm laser light was launched into the optical fibre, with a laser output of 20  $\mu\text{W}$ , for 5 min. Under EW irradiation from the hybrid waveguide, the MIP precursor near the surface of the hybrid waveguide was cured and formed a thin MIP layer with a thickness of approximately  $\sim 1.5 \mu\text{m}$ .

### 3. Removal of templated molecules

The MIP-covered hybrid waveguide was immersed in ethanol for 5 min to rinse away the non-cured monomers and Rh B molecular templates. Removal of the Rh B templates was confirmed directly by microscopic observation. Under the 405 nm light irradiation, the Rh B contained waveguide emits strong yellow fluorescence, while the de-temple waveguide only scatters purple laser light.

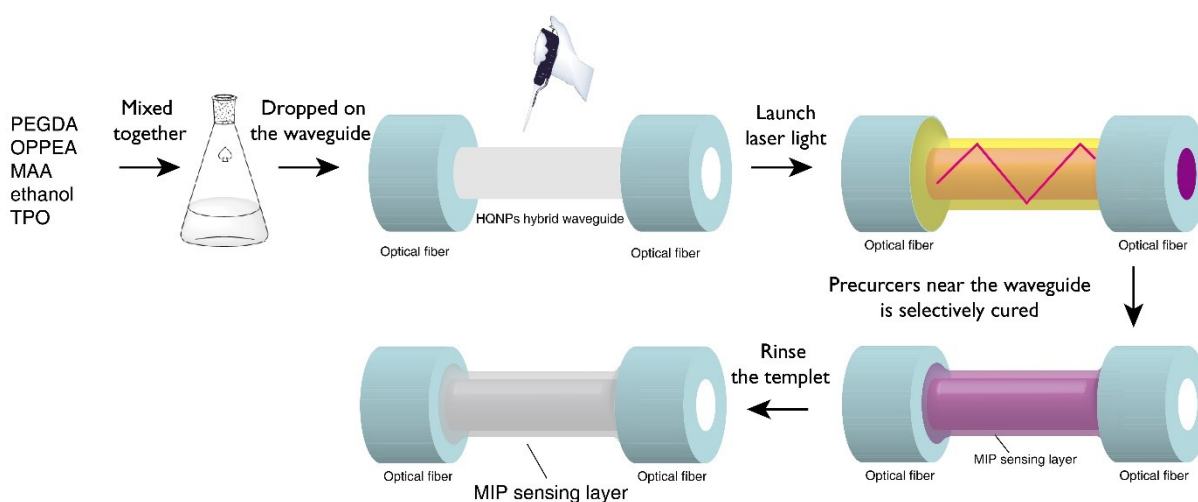

**Figure S6.** Process of MIP-coated waveguide fabrication
